# Supplementary material for: Self-assembly of single “square” quantum rings in gold-free GaAs nanowires
Source: Royal Society of Chemistry journal article supplement (doi:10.1039/c3nr05634a), 2013-12-12
Supplement: c3nr05634a.pdf [file c3nr05634a.pdf]

**Supplementary Information for**  
**Self-assembly of single “square” quantum ring in gold-free**  
**GaAs nanowires**

Guowei Zha,<sup>†</sup> Xiangjun Shang,<sup>†</sup> Dan Su,<sup>†</sup> Ying Yu,<sup>†</sup> Bin Wei,<sup>‡</sup> Li Wang,<sup>‡</sup> Mifeng Li,<sup>†</sup>

Lijuan Wang,<sup>†</sup> Jianxing Xu,<sup>†</sup> Haiqiao Ni,<sup>†</sup> Yuan Ji,<sup>‡</sup> Baoquan Sun<sup>†</sup> and Zhichuan Niu<sup>\*,†</sup>

<sup>†</sup>State Key Laboratory of Superlattices and Microstructures, Institute of Semiconductors, Chinese Academy of Sciences, P.O. Box 912, Beijing 100083, China

<sup>‡</sup>Institute of microstructure and properties of advanced materials, Beijing University of Technology, Beijing 100124, China

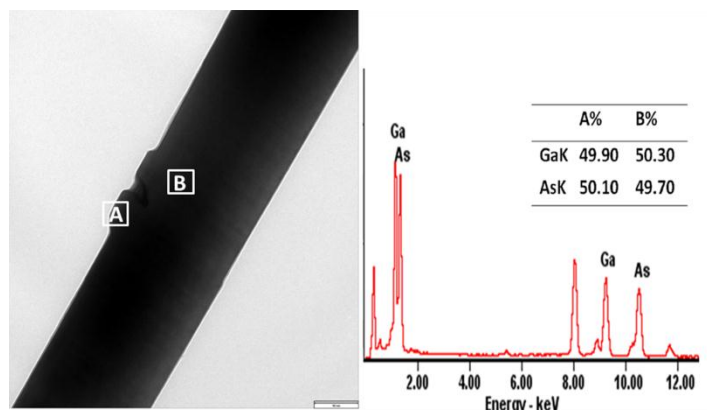

**Figure S1.** Elemental spot scan of EDX measurements on both the QR and NW's backbone, revealing Ga:As ratio of nearly 1:1.

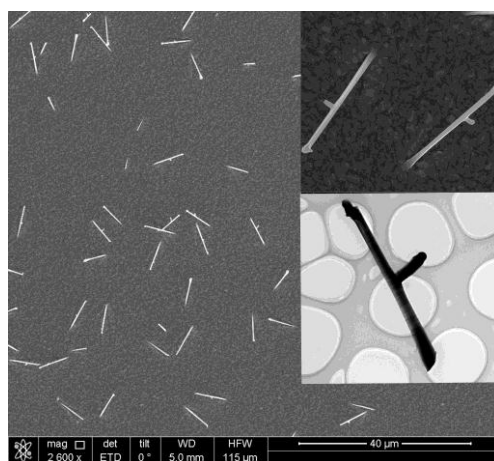

**Figure S2.** A typical  $\text{Al}_{0.45}\text{Ga}_{0.75}\text{As}$  capped QR/NW samples. Branched structures emerge on the sidewall of NWs. The density of branches per NW and the ratio of branched NWs in the sample are consistent with that of QR. We conclude that QR acts as a nucleation site for branches in gallium-rich conditions. The optimized condition for AlGaAs capping are high Al content, As-rich environment and high growth temperature.
